# Supplementary figures and images for: Early detection of prostate cancer in firefighters: a register-based study of prognostic factors and survival
Source: HighWire-hosted journal article supplement (doi:10.1136/oemed-2021-107622), 2021-09-11

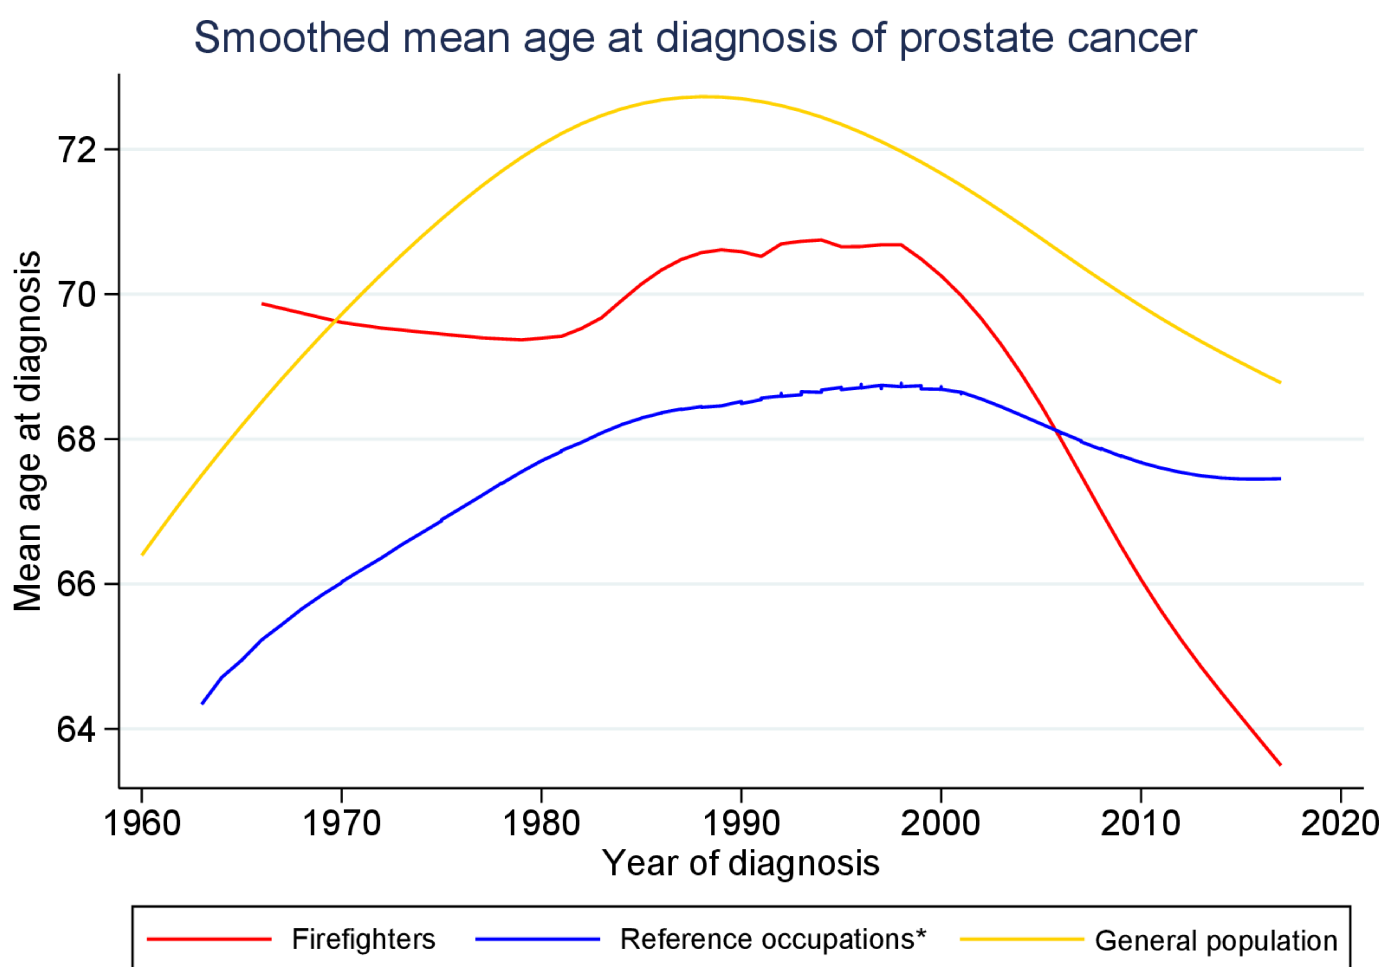

Supplement: oemed-2021-107622supp001_data_supplement.pdf [file oemed-2021-107622supp001_data_supplement.pdf]
